# Supplementary material
Source: MDPI journal article supplement (https://www.mdpi.com/2072-4292/11/21/2529)
Supplement: s1 [file s1]

# Supplementary Material

Table S1 List of Sentinel-1 scenes used for training and testing.

|                |            | Scenes for training the U-Net                                                                                                                                                                                                                                                                                                                                                                                                                                                                                                                                                                                                                                                                                                                                                                                                                                                                                                                                                                                                                                                                                                                                                                                                                                                                                                                                                                                                                                            | Scenes for testing the U-Net                                                                                                               |
|----------------|------------|--------------------------------------------------------------------------------------------------------------------------------------------------------------------------------------------------------------------------------------------------------------------------------------------------------------------------------------------------------------------------------------------------------------------------------------------------------------------------------------------------------------------------------------------------------------------------------------------------------------------------------------------------------------------------------------------------------------------------------------------------------------------------------------------------------------------------------------------------------------------------------------------------------------------------------------------------------------------------------------------------------------------------------------------------------------------------------------------------------------------------------------------------------------------------------------------------------------------------------------------------------------------------------------------------------------------------------------------------------------------------------------------------------------------------------------------------------------------------|--------------------------------------------------------------------------------------------------------------------------------------------|
| Training Sites | Sulzberger | S1A_EW_GRDM_1SDH_20170620T075239_20170620T075343_017114_01C880_C5D4<br>S1A_EW_GRDM_1SDH_20170702T075239_20170702T075344_017289_01CDC5_1356<br>S1A_EW_GRDM_1SDH_20170819T075242_20170819T075346_017989_01E30D_C9BA<br>S1A_EW_GRDM_1SDH_20170831T075243_20170831T075347_018164_01E850_A2F4<br>S1A_EW_GRDM_1SDH_20170924T075243_20170924T075348_018514_01F328_FA7C<br>S1A_EW_GRDM_1SDH_20171123T075243_20171123T075348_019389_020E13_4025<br>S1A_EW_GRDM_1SDH_20180110T075242_20180110T075346_020089_0223F3_0C85<br>S1A_EW_GRDM_1SDH_20180215T075241_20180215T075345_020614_0234AE_6D81<br>S1A_EW_GRDM_1SDH_20180323T075241_20180323T075345_021139_024553_900B<br>S1A_EW_GRDM_1SDH_20180428T075242_20180428T075346_021664_0255C7_E341<br>S1A_EW_GRDM_1SDH_20180522T075243_20180522T075348_022014_0260EA_48FA<br>S1A_EW_GRDM_1SDH_20180719T080901_20180719T081005_022860_027A9B_60B6<br>S1A_EW_GRDM_1SDH_20180812T080902_20180812T081006_023210_0285B7_434F<br>S1A_EW_GRDM_1SDH_20181130T075250_20181130T075354_024814_02BB4F_3171<br>S1A_EW_GRDM_1SDH_20190103T080902_20190103T081006_025310_02CCE0_4C0D<br>S1A_EW_GRDM_1SDH_20190127T080901_20190127T081006_025660_02D99C_5A32<br>S1A_EW_GRDM_1SDH_20190220T080901_20190220T081005_026010_02E61C_1763<br>S1A_EW_GRDM_1SDH_20190304T080901_20190304T081005_026185_02EC63_D471<br>S1A_EW_GRDM_1SDH_20190409T080901_20190409T081006_026710_02FFAD_30DA<br>S1B_EW_GRDM_1SDH_20170521T075155_20170521T075259_005693_009F96_5940 | S1A_EW_GRDM_1SDH_20180620T080051_20180620T080155_022437_026E14_C3B3<br>S1A_EW_GRDM_1SDH_20180623T064732_20180623T064836_022480_026F4A_EC15 |
|                | Victoria   | S1A_EW_GRDM_1SDH_20180516T102148_20180516T102216_021928_025E20_3546<br>S1A_EW_GRDM_1SDH_20181107T101350_20181107T101421_024480_02AF23_E5E0<br>S1B_EW_GRDM_1SDH_20170719T102912_20170719T102934_006555_00B874_63DE<br>S1B_EW_GRDM_1SDH_20170910T103720_20170910T103739_007328_00CED9_9010<br>S1B_EW_GRDM_1SDH_20180821T101302_20180821T101335_012359_016C94_280A<br>S1B_EW_GRDM_1SDH_20181231T101302_20181231T101335_014284_01A92C_EAB3                                                                                                                                                                                                                                                                                                                                                                                                                                                                                                                                                                                                                                                                                                                                                                                                                                                                                                                                                                                                                                   | S1B_EW_GRDM_1SDH_20180629T100454_20180629T100526_011586_0154CB_CD19<br>S1B_EW_GRDM_1SDH_20180620T102912_20180620T102939_011455_0150B6_292C |
|                | Wilkes     | S1A_EW_GRDM_1SDH_20171126T113841_20171126T113946_019435_020F86_F6C6<br>S1A_EW_GRDM_1SDH_20180218T113839_20180218T113943_020660_02361F_FF87<br>S1A_EW_GRDM_1SDH_20180829T113847_20180829T113952_023460_028DC0_B232<br>S1A_EW_GRDM_1SDH_20181215T113847_20181215T113951_025035_02C2FC_04B7<br>S1B_EW_GRDM_1SDH_20180730T113804_20180730T113908_012039_0162AB_B608<br>S1B_EW_GRDM_1SDH_20180928T113806_20180928T113910_012914_017DA0_7CC3                                                                                                                                                                                                                                                                                                                                                                                                                                                                                                                                                                                                                                                                                                                                                                                                                                                                                                                                                                                                                                   | S1A_EW_GRDM_1SDH_20180618T113843_20180618T113934_022410_026D43_A538                                                                        |

|            |             |                                                                                                                                                                                                                                                                                                                                                                                                                                        |                                                                                                                                            |
|------------|-------------|----------------------------------------------------------------------------------------------------------------------------------------------------------------------------------------------------------------------------------------------------------------------------------------------------------------------------------------------------------------------------------------------------------------------------------------|--------------------------------------------------------------------------------------------------------------------------------------------|
| Test Sites | Shackleton  | S1A_EW_GRDM_1SDH_20170722T132553_20170722T132657_017584_01D6A9_5238<br>S1A_EW_GRDM_1SDH_20170920T132556_20170920T132700_018459_01F15A_7E2D<br>S1A_EW_GRDM_1SDH_20171119T132556_20171119T132700_019334_020C46_6E90<br>S1A_EW_GRDM_1SDH_20180331T132553_20180331T132658_021259_024912_8601<br>S1A_EW_GRDM_1SDH_20180530T132556_20180530T132700_022134_0264B6_96F8<br>S1A_EW_GRDM_1SDH_20190218T132600_20190218T132704_025984_02E526_D0D7 | S1A_EW_GRDM_1SDH_20180623T132558_20180623T132702_022484_026F6A_DD3E                                                                        |
|            | Marie Byrd  |                                                                                                                                                                                                                                                                                                                                                                                                                                        | S1A_EW_GRDM_1SDH_20180618T050038_20180618T050143_022406_026D25_2F9A<br>S1A_EW_GRDM_1SDH_20180619T054206_20180619T054310_022421_026DA1_B299 |
|            | Wordie      |                                                                                                                                                                                                                                                                                                                                                                                                                                        | S1A_EW_GRDM_1SDH_20180611T081911_20180611T081941_022306_026A14_C45F                                                                        |
|            | Ekstornisen |                                                                                                                                                                                                                                                                                                                                                                                                                                        | S1B_EW_GRDM_1SDH_20180626T211218_20180626T211323_011549_0153A9_120B                                                                        |
|            | Oats Land   |                                                                                                                                                                                                                                                                                                                                                                                                                                        | S1B_EW_GRDM_1SDH_20180626T094138_20180626T094238_011542_01536C_EB6F                                                                        |

4

5

Table S2 Scenes used to create the calving front time-series for Getz ice shelf.

| No. | Scene                                                               |
|-----|---------------------------------------------------------------------|
| 1   | S1B_EW_GRDM_1SDH_20170520T053252_20170520T053357_005677_009F1F_1587 |
| 2   | S1A_EW_GRDM_1SDH_20180708T053343_20180708T053450_022698_0275A8_20C7 |
| 3   | S1A_EW_GRDM_1SDH_20180614T053342_20180614T053449_022348_026B6A_3619 |
| 4   | S1A_EW_GRDM_1SDH_20180509T053340_20180509T053444_021823_025AD0_CD69 |
| 5   | S1A_EW_GRDM_1SDH_20180403T053338_20180403T053443_021298_024A59_A3A0 |
| 6   | S1A_EW_GRDM_1SDH_20180310T053338_20180310T053442_020948_023F41_7D47 |
| 7   | S1A_EW_GRDM_1SDH_20180202T053338_20180202T053443_020423_022E8F_1B56 |
| 8   | S1A_EW_GRDM_1SDH_20180109T053339_20180109T053443_020073_02236D_FA92 |
| 9   | S1A_EW_GRDM_1SDH_20171204T053340_20171204T053445_019548_02130B_411D |
| 10  | S1A_EW_GRDM_1SDH_20171110T053341_20171110T053445_019198_02080C_EFC9 |
| 11  | S1A_EW_GRDM_1SDH_20171005T053341_20171005T053445_018673_01F7FB_404D |
| 12  | S1A_EW_GRDM_1SDH_20170911T053340_20170911T053445_018323_01ED47_EEC8 |
| 13  | S1A_EW_GRDM_1SDH_20170806T053339_20170806T053443_017798_01DD3B_2024 |
| 14  | S1A_EW_GRDM_1SDH_20170701T053337_20170701T053441_017273_01CD41_830F |
| 15  | S1A_EW_GRDM_1SDH_20170607T053336_20170607T053440_016923_01C293_750C |

6

7

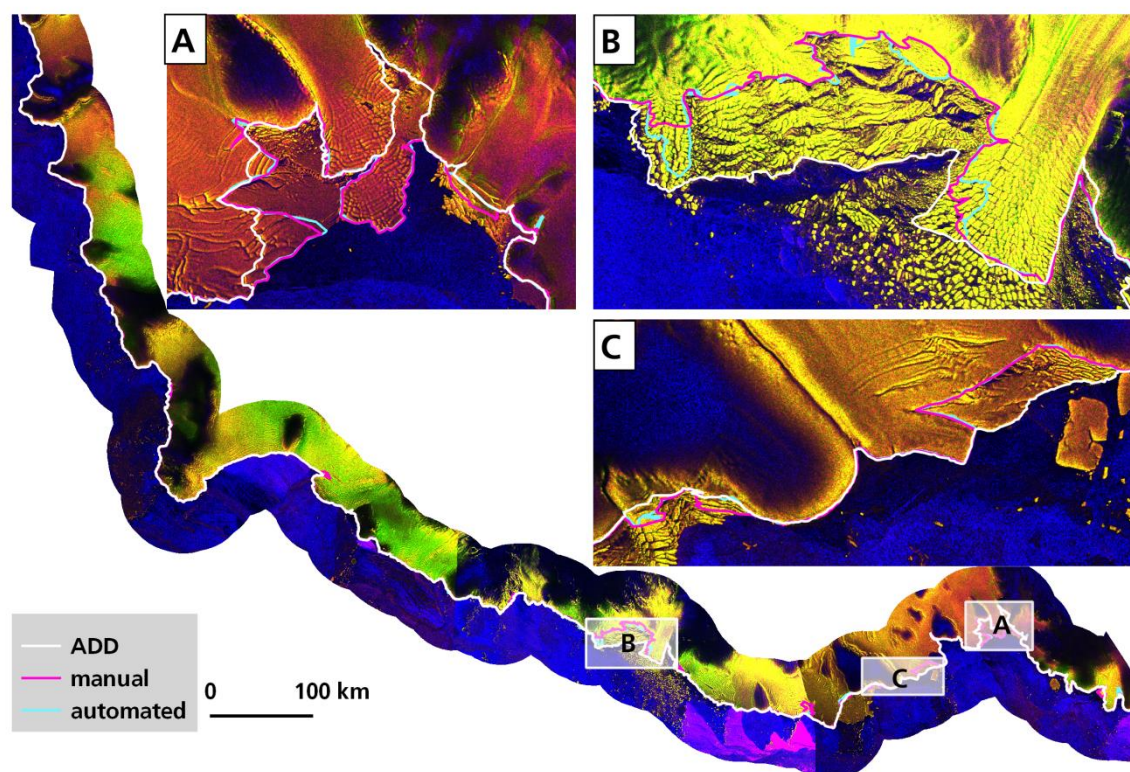

Figure S1 Comparison of the extracted coastline along Marie Byrd Land with a manual reference and the ADD coastline for June 2018. Figures A to C show magnifications of coastal sections with major deviations. Background: Sentinel-1 scenes between 18<sup>th</sup> and 23<sup>rd</sup> of June 2018.

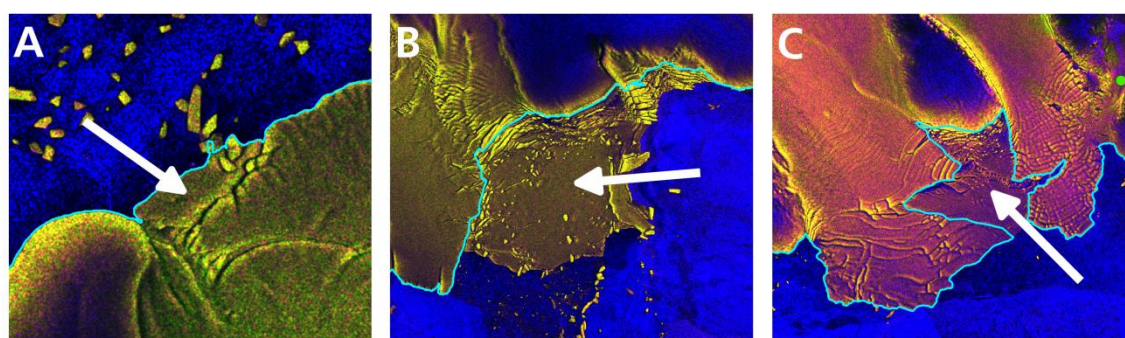

Figure S2 Three examples of fast ice areas (indicated with white arrow) with very similar backscatter characteristics to glacier ice. The turquoise line indicates the automatically extracted coastline. Image A is at the front of Ekstromisen ice shelf where the fast ice was not detected. B & C at Nickerson and Sulzberger ice shelf with well recognized fast ice areas. Background: Sentinel-1 imagery, June 2018.
